# Supplementary material
Source: ML conference proceedings conference paper supplement (https://proceedings.neurips.cc/paper_files/paper/2023/hash/8c3c666820ea055a77726d66fc7d447f-Abstract.html)
Supplement: Supplementary file 1 [file 8c3c666820ea055a77726d66fc7d447f-Supplemental-Datasets_and_Benchmarks.zip]

Archive with 2 entries (2 files):
- libero_supp.pdf
- __MACOSX/._libero_supp.pdf
